# Supplementary material for: Memory persistence and differentiation into antibody-secreting cells accompanied by positive selection in longitudinal BCR repertoires
Source: eLife. 2022 Sep 15;11:e79254. doi: 10.7554/eLife.79254 (PMC9525062; doi:10.7554/eLife.79254)
Supplement: Figure 1—source data 2. [file elife-79254-fig1-data2.xlsx]

## Sheet: Supplementary Data SD2
Supplementary Data SD2. Isotype frequencies per sample
ID	Isotype frequency by number of unique nucleotide sequences (clonotypes)					Isotype frequency by number of identified IGH cDNA molecules
	IgM	IgD	IgG	IgE	IgA	IgM	IgD	IgG	IgE	IgA
AT_T1_Bmem_1	0.626	0.105	0.087	0	0.181	0.6622	0.0699	0.0717	0.0016	0.1946
AT_T1_PBL_1	0.0403	0.0054	0.3296	0.0012	0.6235	0.0567	0.00066	0.22175	0.00105	0.71985
AT_T1_PL_1	0.079	0.005	0.363	0.017	0.536	0.1585	0.0016	0.2203	0.0099	0.6098
AT_T2_Bmem_1	0.53	0.111	0.129	0	0.229	0.602	0.068	0.093	0.001	0.237
AT_T2_Bmem_2	0.547	0.101	0.121	0	0.23	0.572	0.066	0.093	0	0.27
AT_T2_PBL_1	0.051	0.0043	0.3012	0.0022	0.6413	0.0701	0.0024	0.2055	0.0007	0.7214
AT_T2_PL_1	0.086	0.0044	0.3105	0.0073	0.5918	0.1213	0.0008	0.1978	0.0043	0.6758
AT_T3_Bmem_1	0.484	0.07	0.137	0	0.309	0.528	0.044	0.095	0	0.333
AT_T3_Bmem_2	0.513	0.057	0.11	0	0.319	0.475	0.043	0.094	0	0.388
AT_T3_PBL_1	0.0398	0.0048	0.2373	0.0016	0.7166	0.0569	0.0001	0.1705	0.0024	0.77
AT_T3_PBL_2	0.057	0	0.203	0.001	0.739	0.072	0	0.13	0	0.797
AT_T3_PL_1	0.166	0	0.236	0	0.599	0.24	0	0.14	0	0.61
AT_T3_PL_2	0.192	0.004	0.179	0.004	0.62	0.2523	0.0072	0.1154	0.0028	0.6224
D01_T2_Bmem_1	0.3436	0.0783	0.2425	0	0.3356	0.46	0.04	0.16	0	0.34
D01_T2_Bmem_3	0.363	0.075	0.234	0	0.328	0.405	0.038	0.167	0	0.389
D01_T2_PBL_1	0.039	0.007	0.348	0	0.606	0.059	0.004	0.264	0	0.673
D01_T2_PBL_2	0.039	0.011	0.36	0	0.59	0.081	0.005	0.264	0	0.65
D01_T2_PL_1	0.089	0.004	0.296	0	0.61	0.1689	0.0039	0.1619	0	0.6652
D01_T2_PL_2	0.086	0.01	0.329	0	0.576	0.175	0.006	0.153	0	0.666
D01_T3_Bmem_1	0.413	0.066	0.164	0	0.357	0.445	0.043	0.13	0.002	0.38
D01_T3_Bmem_2	0.3574	0.071	0.2218	0.0001	0.3498	0.407	0.045	0.175	0.003	0.37
D01_T3_PBL_1	0.0222	0.0083	0.4014	0.0014	0.5667	0.0311	0.0033	0.3193	0.0004	0.6458
D01_T3_PBL_2	0.022	0.01	0.372	0	0.596	0.02	0.005	0.377	0	0.598
D01_T3_PBL_3	0.016	0.006	0.402	0	0.575	0.0149	0.0076	0.3958	0	0.5817
D01_T3_PL_1	0.0471	0.0067	0.5556	0.0135	0.3771	0.08	0.001	0.466	0.011	0.442
D01_T3_PL_2	0.0333	0.0044	0.5467	0.0089	0.4067	0.0637	0.002	0.4446	0.0069	0.4828
IM_T1_Bmem_1	0.5321	0.0832	0.1969	0	0.1878	0.627	0.052	0.15	0	0.172
IM_T1_PL_1	0.18	0	0.35	0	0.46	0.393	0	0.292	0	0.315
IM_T2_Bmem_1	0.679	0.032	0.06	0	0.229	0.688	0.019	0.05	0	0.243
IM_T2_Bmem_2	0.541	0.062	0.149	0	0.247	0.594	0.029	0.097	0	0.28
IM_T2_PBL_1	0.213	0.002	0.344	0	0.442	0.37	0	0.16	0	0.47
IM_T2_PBL_3	0.224	0.002	0.319	0	0.455	0.36	0	0.15	0	0.48
IM_T2_PL_2	0.2	0.001	0.285	0	0.513	0.282	0	0.196	0	0.522
IM_T3_Bmem_1	0.632	0.069	0.102	0	0.197	0.631	0.041	0.095	0	0.233
IM_T3_Bmem_2	0.659	0.066	0.081	0	0.194	0.644	0.041	0.082	0	0.234
IM_T3_PBL_1	0.047	0.002	0.496	0	0.455	0.066	0	0.349	0	0.586
IM_T3_PBL_2	0.061	0	0.519	0	0.421	0.09	0	0.35	0	0.56
IM_T3_PL_1	0.0926	0	0.4506	0	0.4568	0.12	0	0.28	0	0.6
IM_T3_PL_2	0.111	0	0.401	0	0.488	0.142	0	0.233	0	0.625
IZ_T1_Bmem_1	0.747	0.124	0.019	0	0.11	0.764	0.082	0.021	0	0.133
IZ_T1_PBL_1	0.057	0.004	0.106	0	0.834	0.067	0.0001	0.0612	0	0.8717
IZ_T1_PL_1	0.223	0.012	0.114	0.001	0.648	0.34973	0.00018	0.05669	0.00052	0.59288
IZ_T2_Bmem_1	0.688	0.121	0.033	0	0.158	0.726	0.065	0.029	0	0.18
IZ_T2_Bmem_2	0.686	0.117	0.035	0	0.162	0.722	0.059	0.031	0	0.189
IZ_T2_PBL_1	0.085	0.001	0.13	0	0.784	0.119	0	0.076	0	0.806
IZ_T2_PBL_2	0.093	0	0.117	0	0.79	0.115	0	0.098	0	0.786
IZ_T2_PL_1	0.221	0.0062	0.1592	0.0015	0.6121	0.30554	0.0001	0.10421	0.00093	0.58921
IZ_T2_PL_2	0.199	0.002	0.178	0.002	0.619	0.2753	0.0001	0.1393	0.0017	0.5836
IZ_T3_Bmem_1	0.706	0.1	0.036	0	0.157	0.768	0.051	0.024	0	0.157
IZ_T3_Bmem_2	0.709	0.097	0.031	0	0.162	0.768	0.041	0.02	0	0.171
IZ_T3_PBL_1	0.141	0.01	0.1	0	0.75	0.2	0	0.061	0	0.738
IZ_T3_PBL_2	0.151	0.004	0.106	0	0.74	0.217	0	0.063	0	0.72
IZ_T3_PL_1	0.366	0.024	0.044	0.005	0.561	0.4432	0.0002	0.033	0.0018	0.5219
IZ_T3_PL_2	0.515	0.004	0.053	0	0.427	0.591	0	0.027	0	0.382
MRK_T1_Bmem_1	0.5143	0.1687	0.1544	0	0.1626	0.6399	0.1062	0.0978	0	0.1561
MRK_T1_PL_1	0.124	0.05	0.438	0	0.388	0.19	0.03	0.34	0	0.45
MRK_T2_Bmem_1	0.47	0.118	0.213	0	0.2	0.481	0.062	0.182	0.001	0.275
MRK_T2_Bmem_2	0.54387	0.12859	0.12896	5e-05	0.19853	0.548	0.076	0.109	0	0.267
MRK_T2_PBL_1	0.063	0.005	0.255	0	0.677	0.075	0.001	0.148	0	0.776
MRK_T2_PBL_3	0.056	0.002	0.271	0	0.671	0.047	0	0.173	0	0.781
MRK_T2_PBL_4	0.045	0.001	0.272	0	0.682	0.051	0	0.191	0	0.758
MRK_T2_PL_1	0.0891	0.0078	0.3941	0.0013	0.5078	0.1371	0.0031	0.237	0.0008	0.622
MRK_T2_PL_2	0.08	0.0038	0.3862	0.005	0.525	0.12714	0.00336	0.21611	0.00309	0.65029
MRK_T2_PL_3	0.0811	0.0042	0.4066	0.0017	0.5063	0.09902	0.00156	0.25045	0.0006	0.64836
MRK_T3_PL_1	0.075	0.003	0.325	0	0.597	0.129	0.002	0.229	0	0.64
MT_T3_Bmem_1	0.558	0.06	0.125	0	0.257	0.538	0.041	0.132	0	0.289
MT_T3_Bmem_2	0.564	0.061	0.128	0	0.246	0.579	0.037	0.106	0	0.278
MT_T3_PBL_1	0.0322	0.0265	0.1799	0	0.7614	0.036	0.013	0.18	0	0.771
MT_T3_PBL_2	0.032	0.02	0.229	0	0.718	0.057	0.017	0.196	0	0.73
MT_T3_PL_1	0.049	0.023	0.317	0	0.612	0.069	0.013	0.235	0	0.682
