# Supplementary figures and images for: Memory persistence and differentiation into antibody-secreting cells accompanied by positive selection in longitudinal BCR repertoires
Source: eLife journal article supplement (doi:10.7554/elife.79254), 2022-09-15

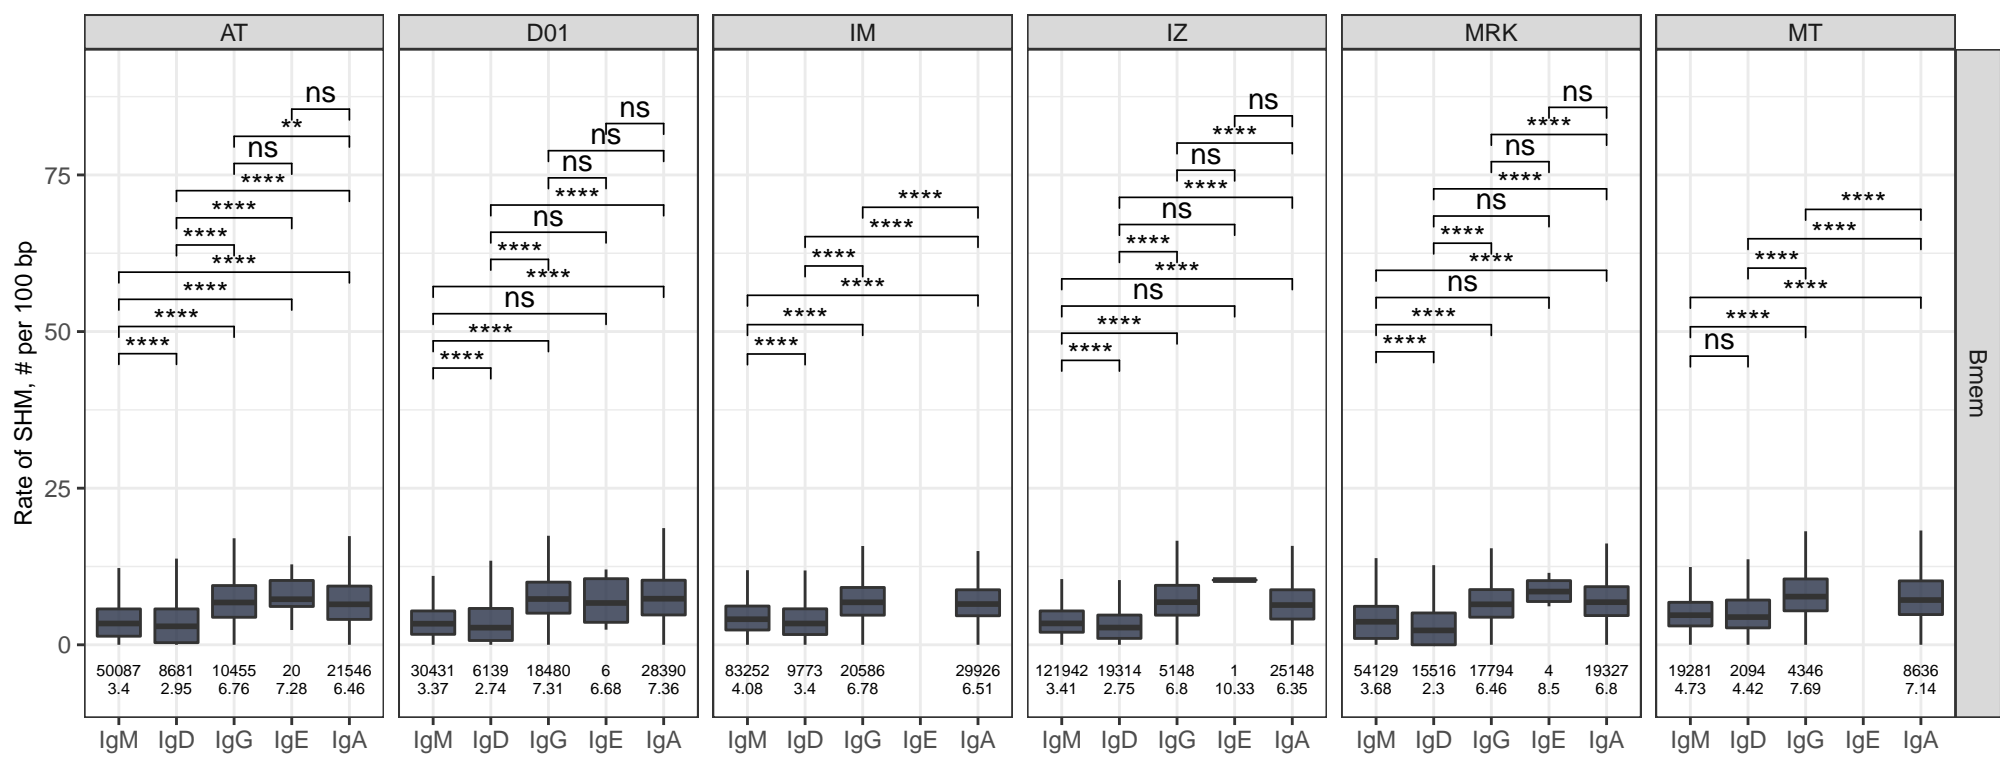

Supplement: supp [file elife-79254-supp-v2.zip]

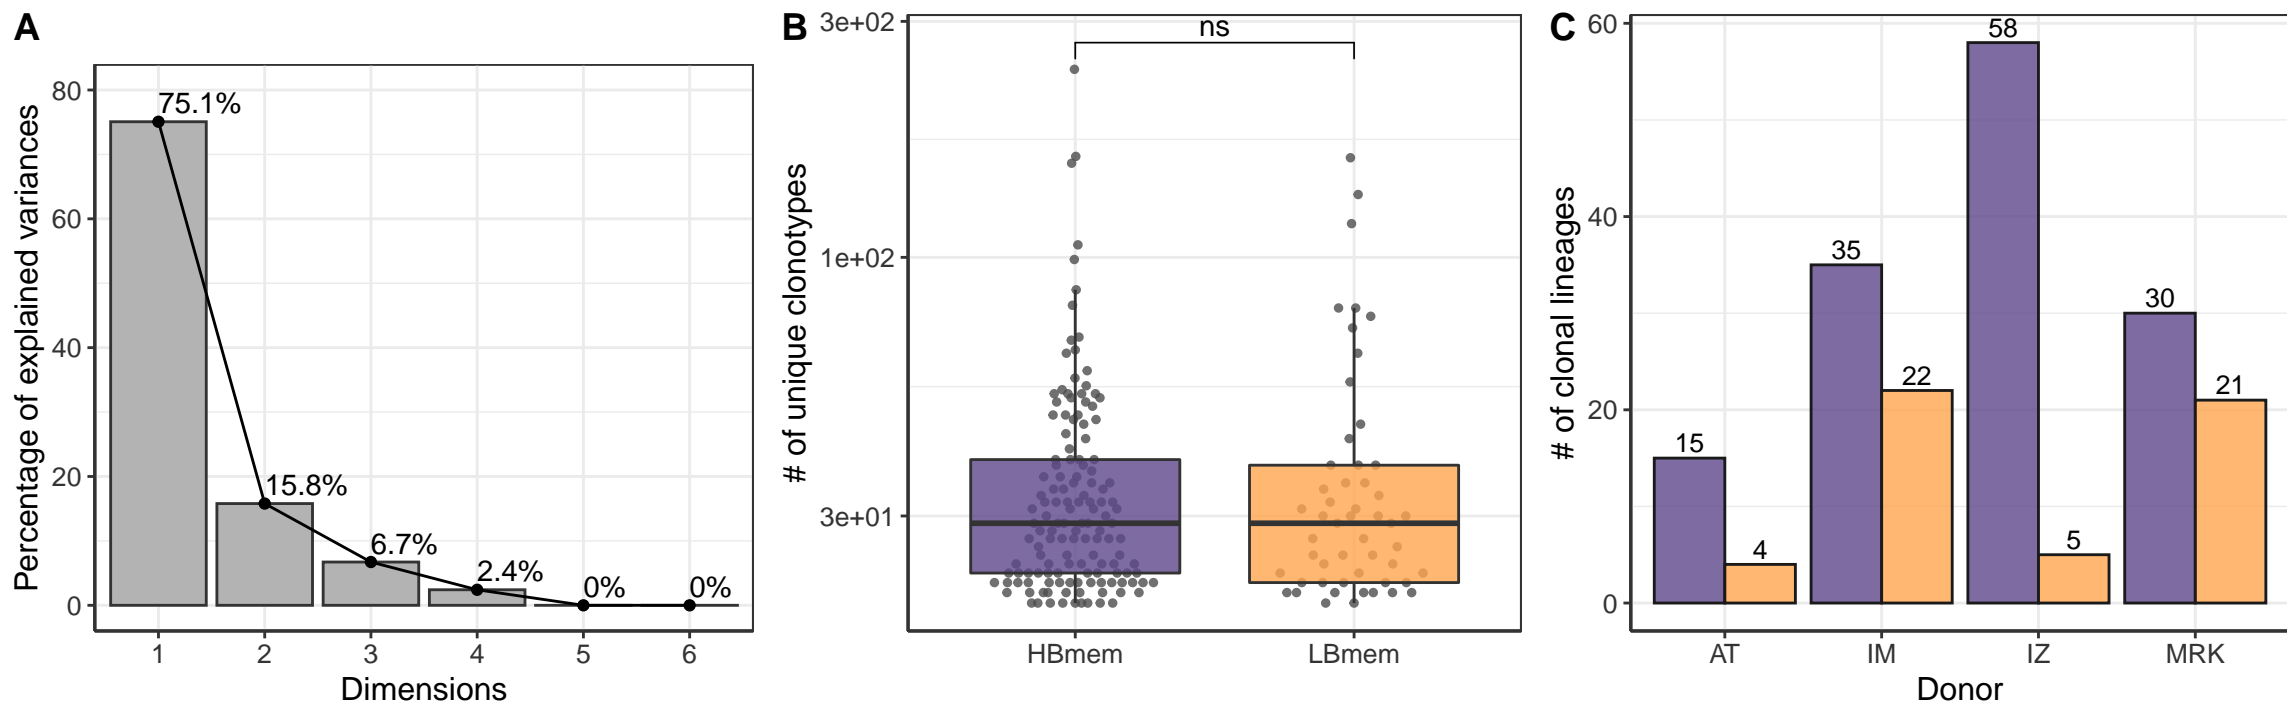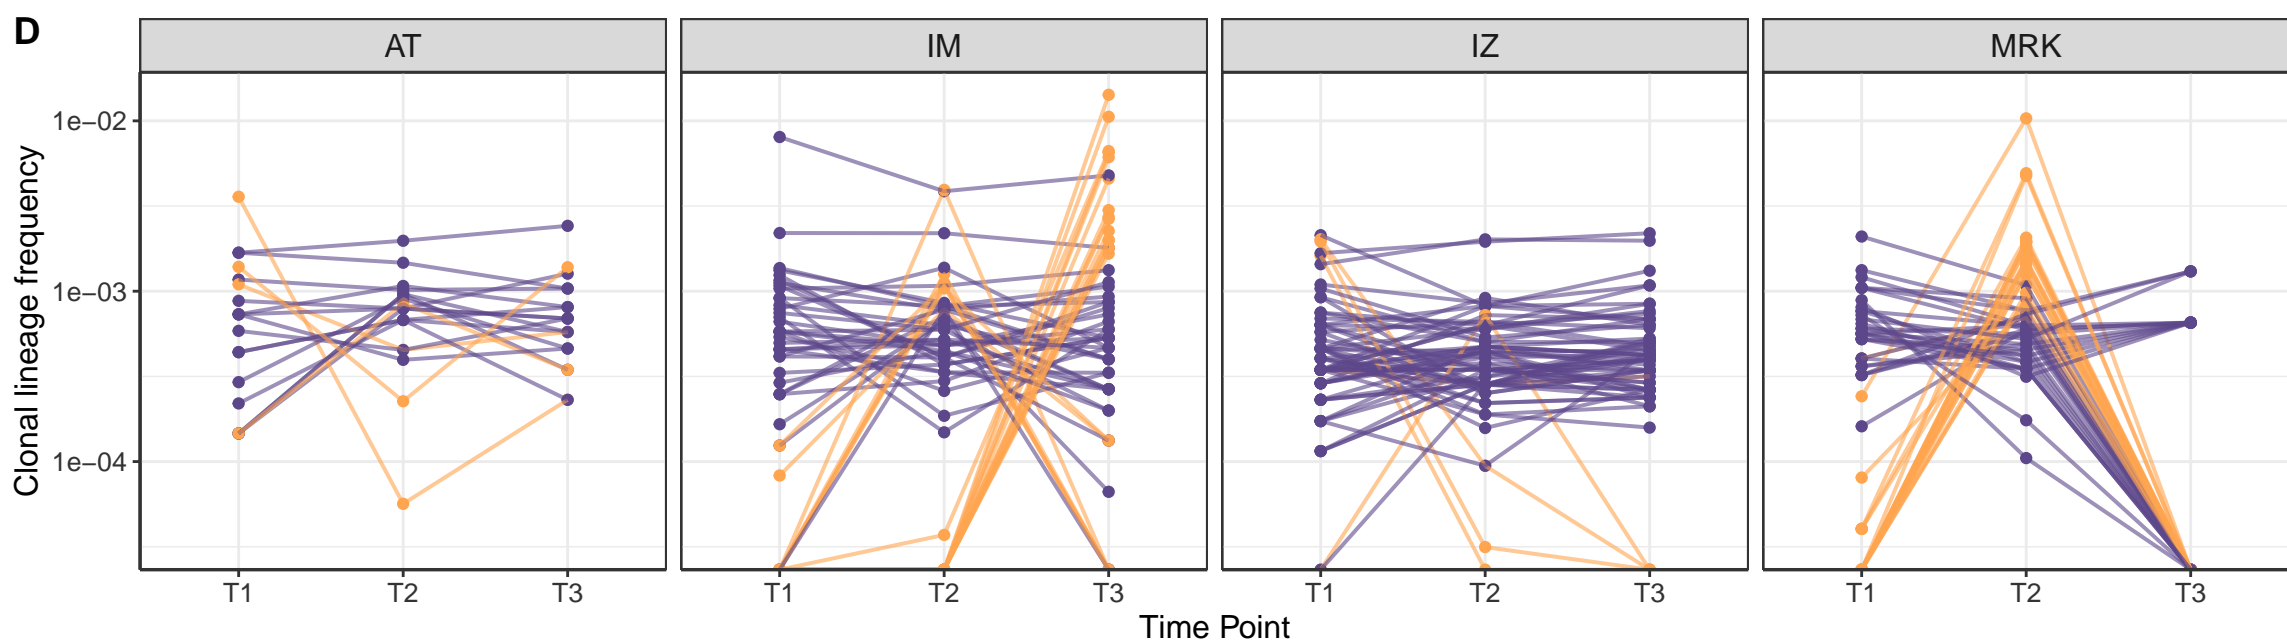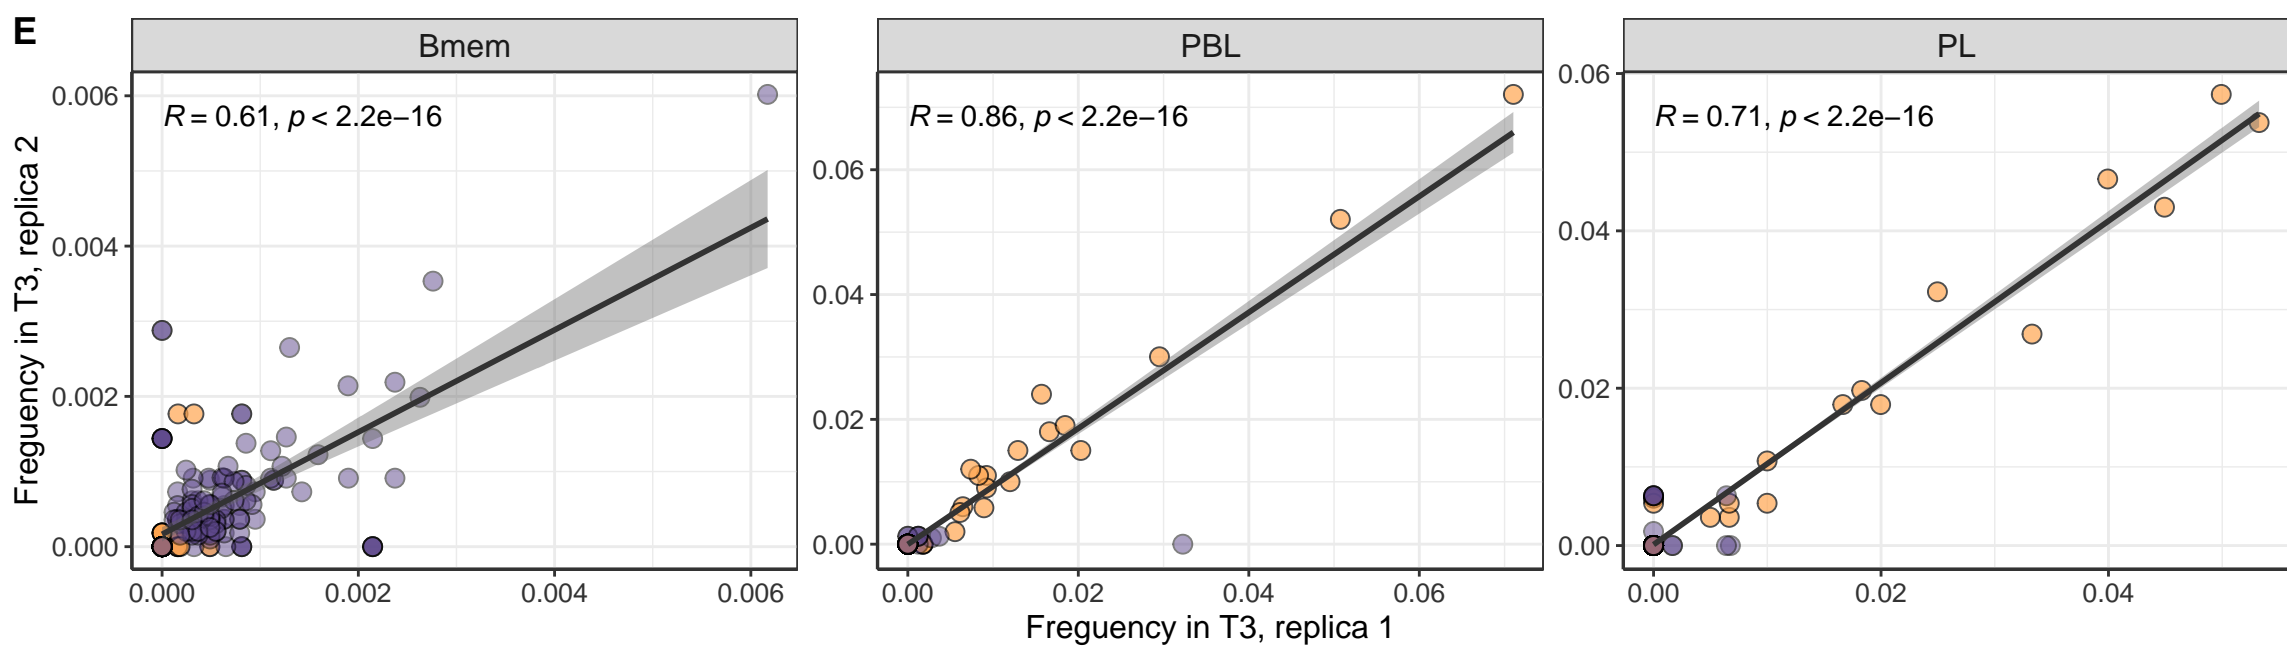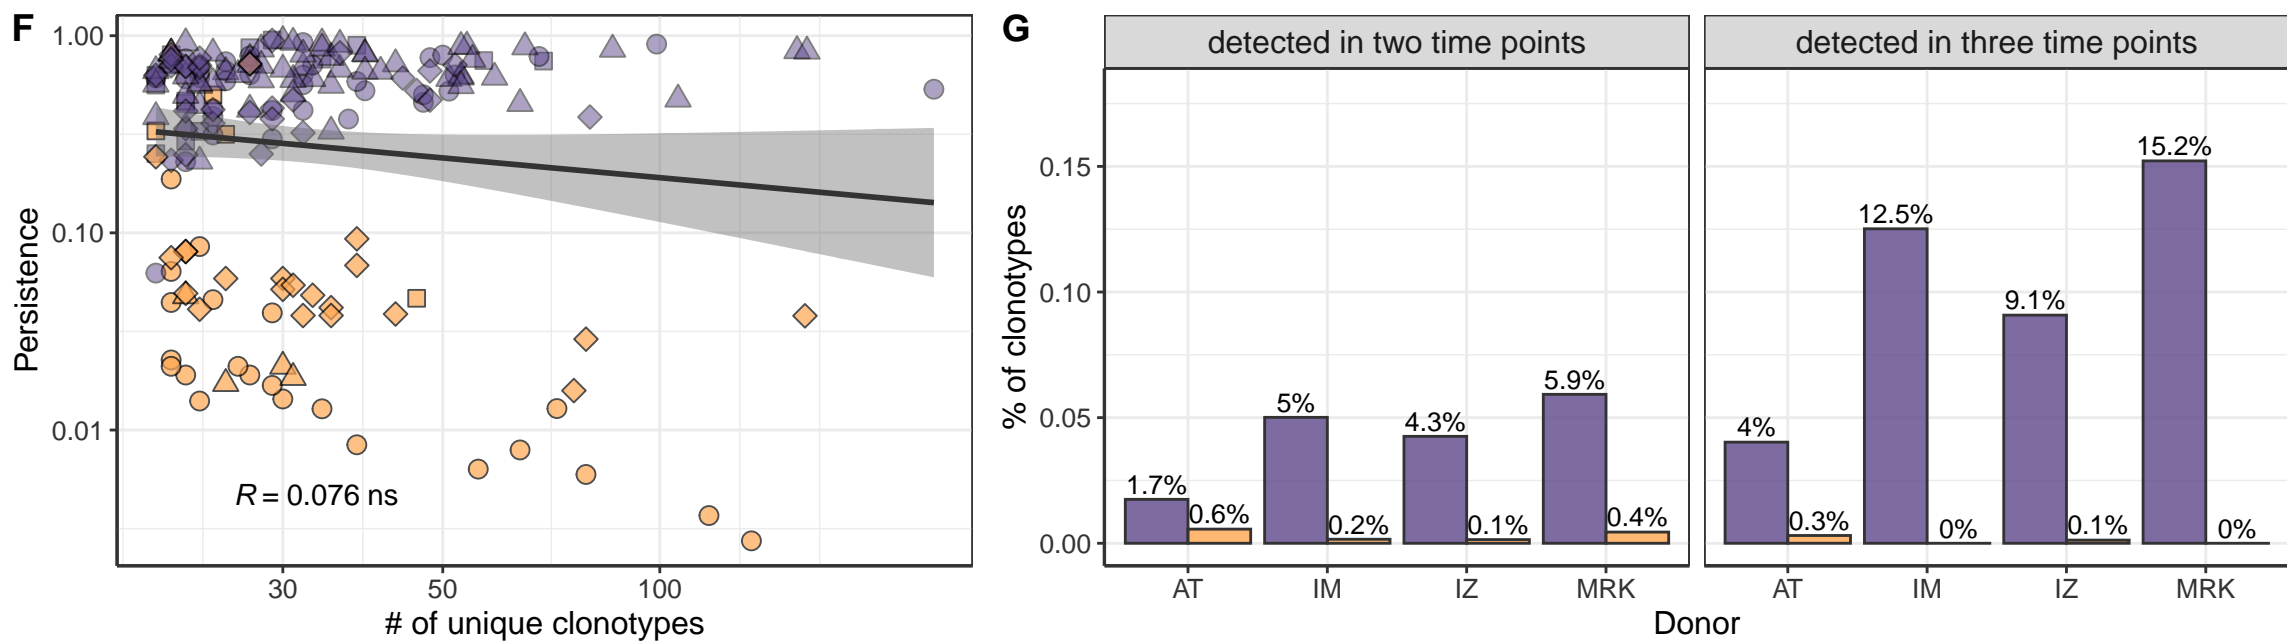

Supplement: supp [file elife-79254-supp-v2.zip]

Time point  T1  T2  T3

**A**

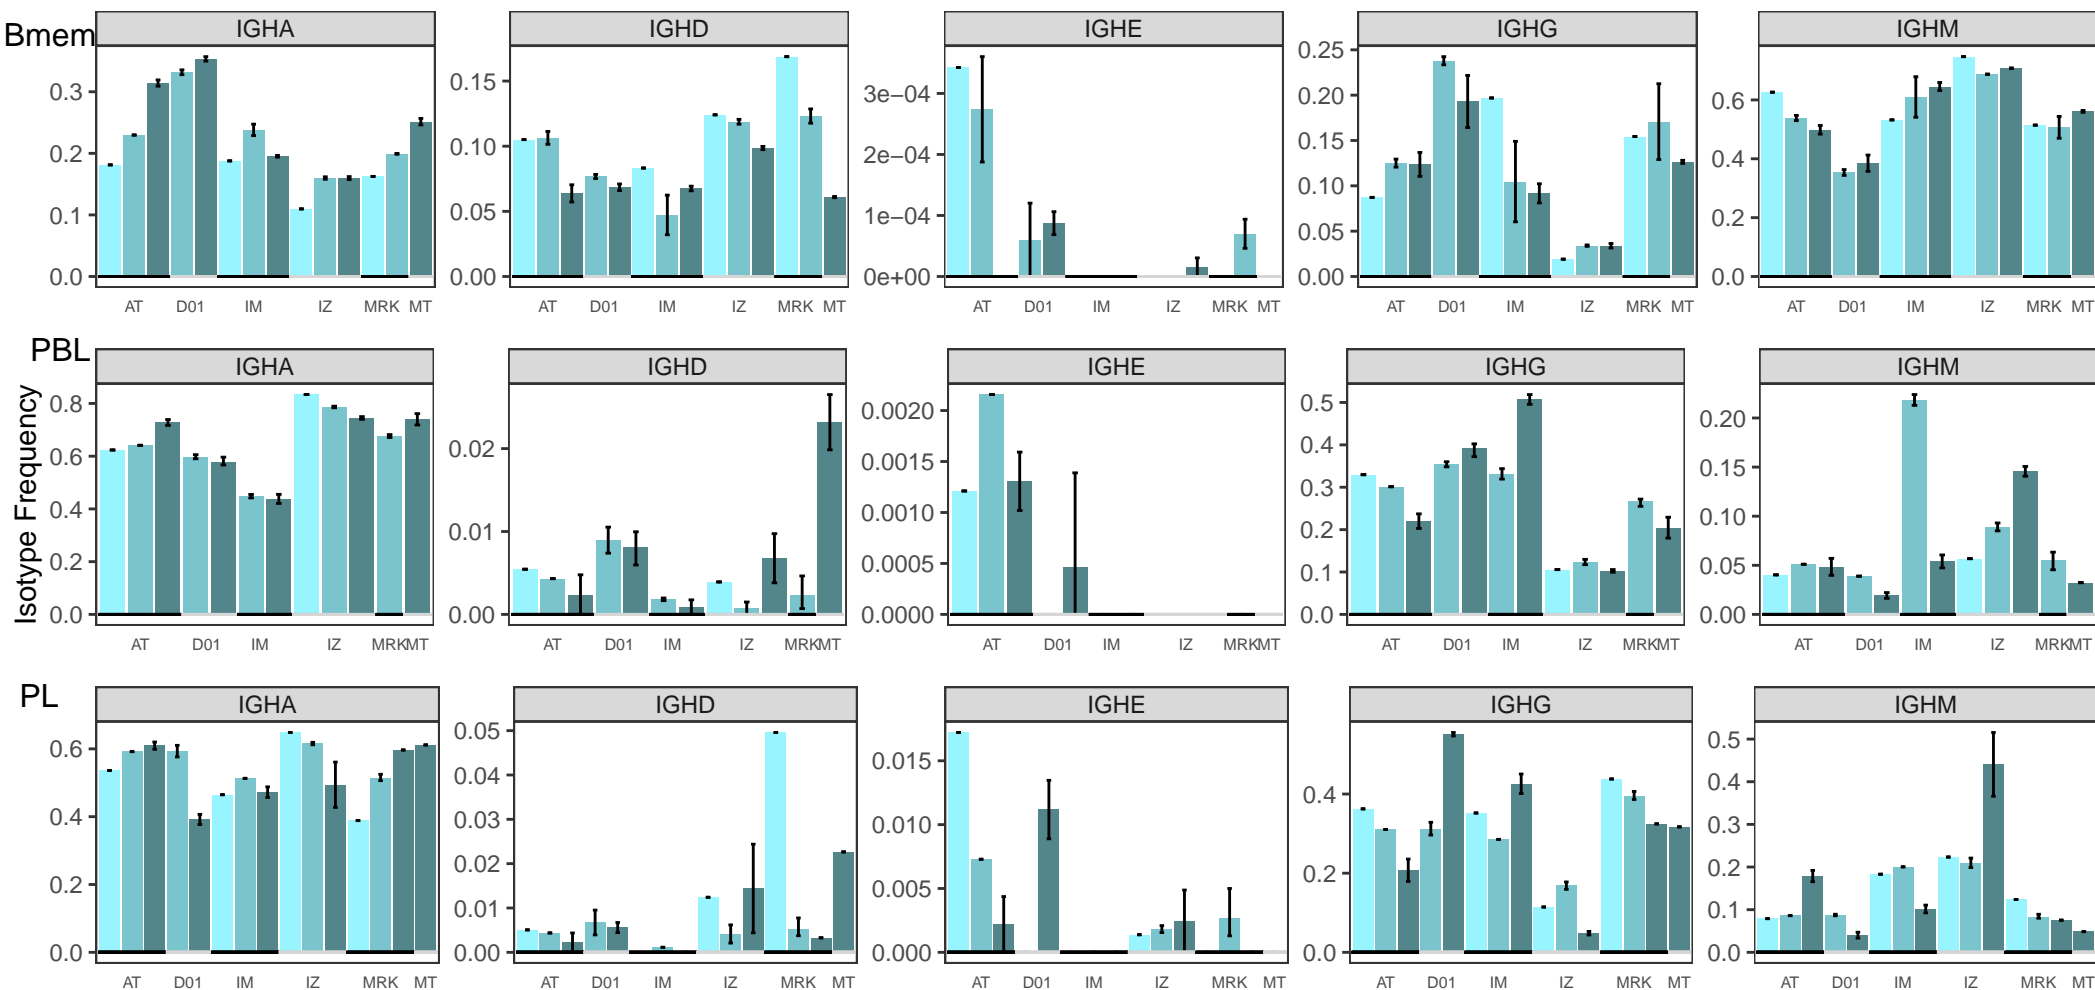

# B

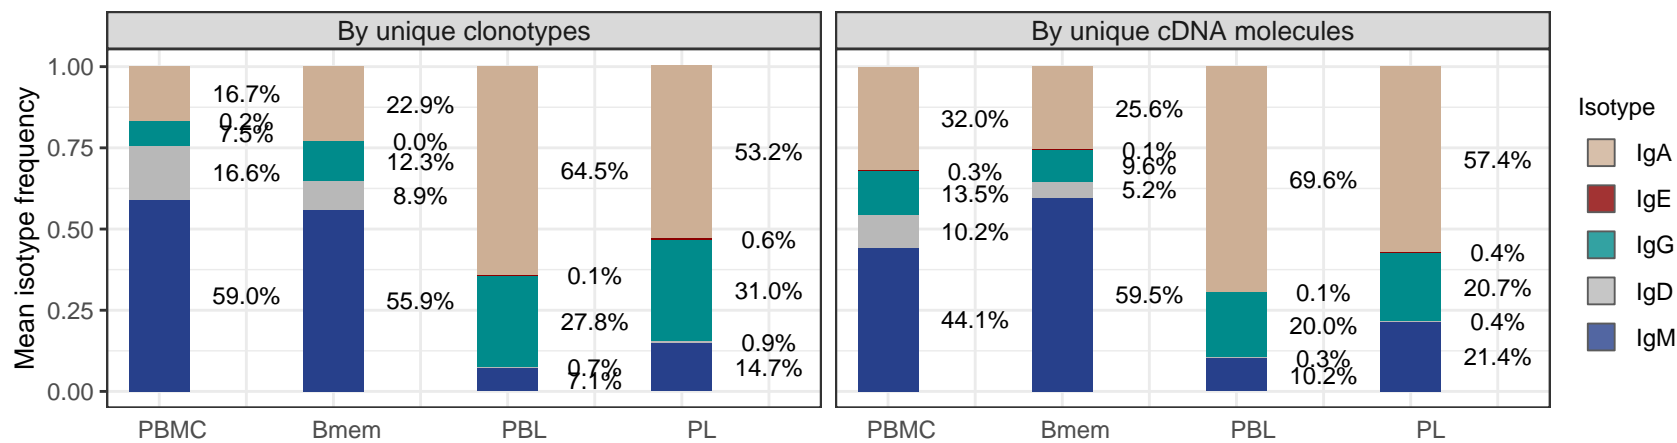

Supplement: supp [file elife-79254-supp-v2.zip]

Subset Bmem PBL PL

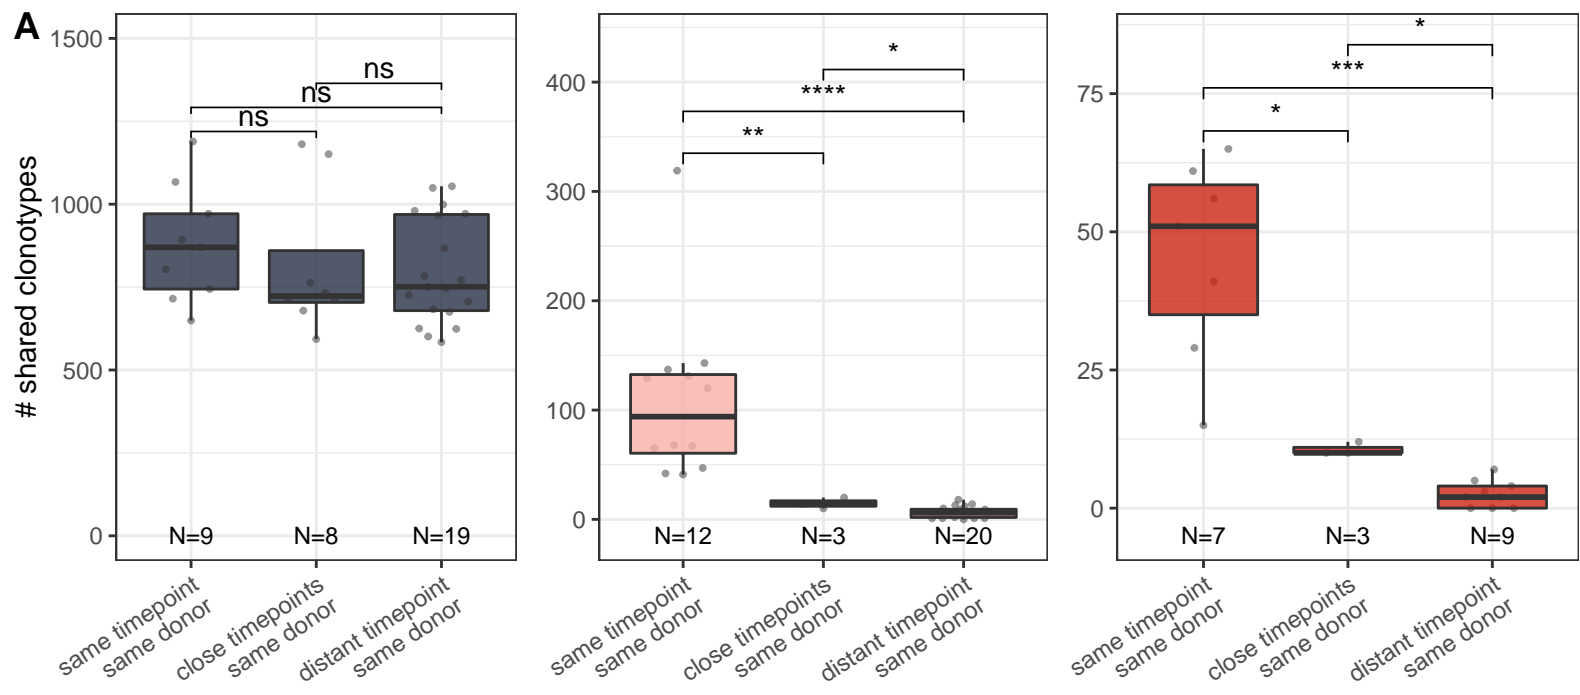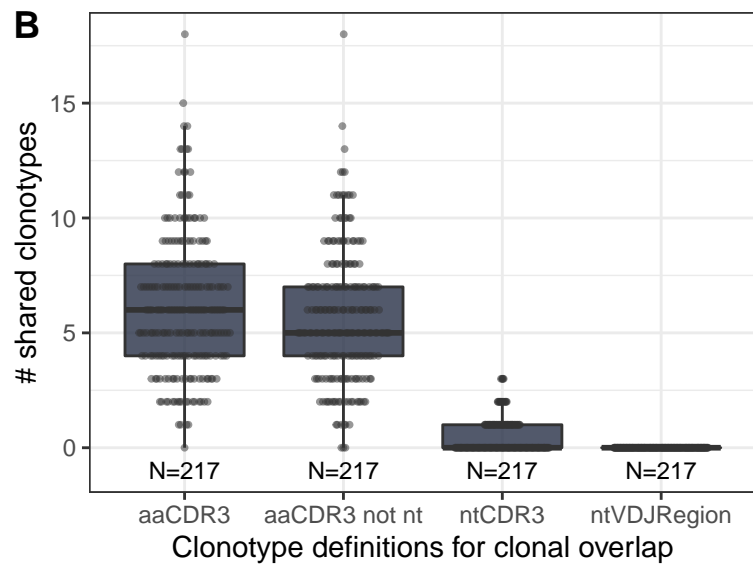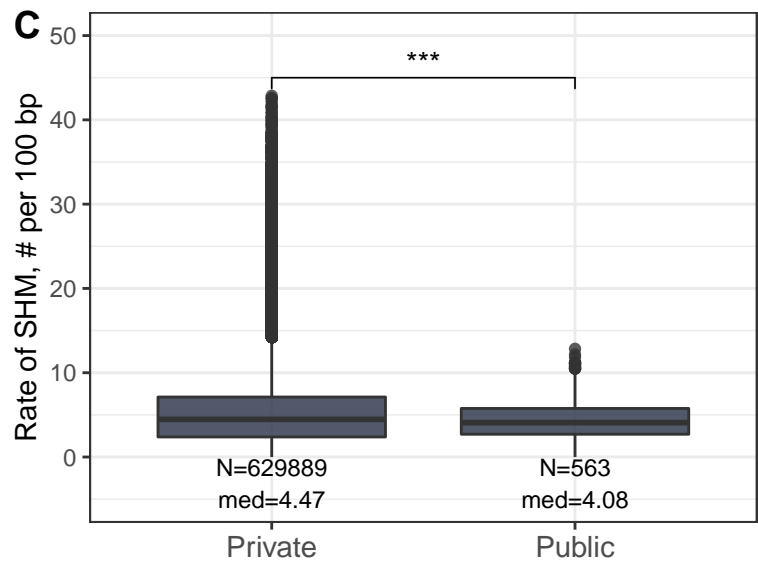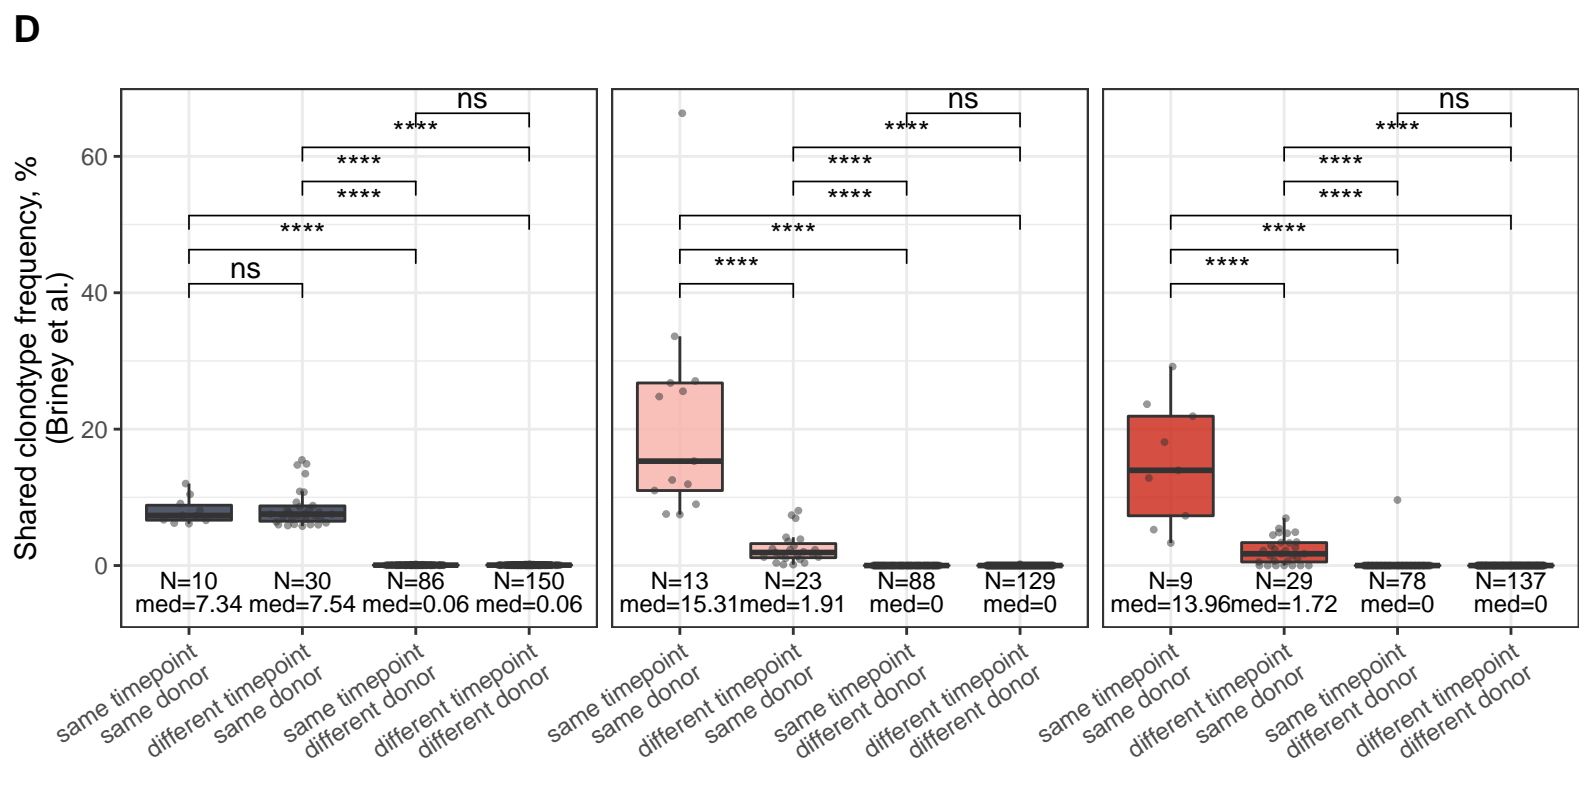

Supplement: supp [file elife-79254-supp-v2.zip]

**A**

rest most abundant lineages (N>19)

**AT**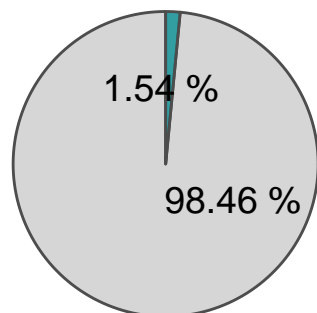**IM**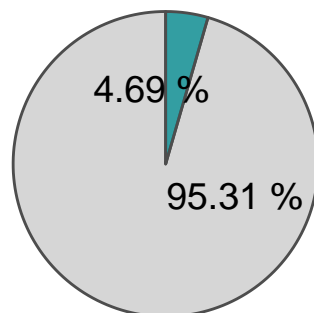**IZ**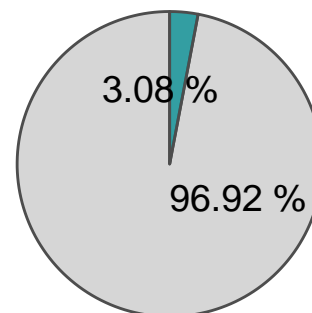**MRK**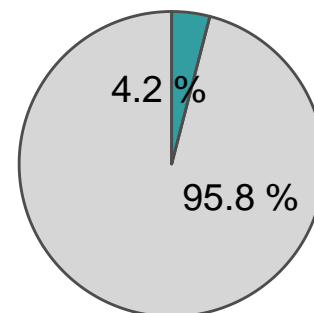**B**

Subset Bmem PBL PL

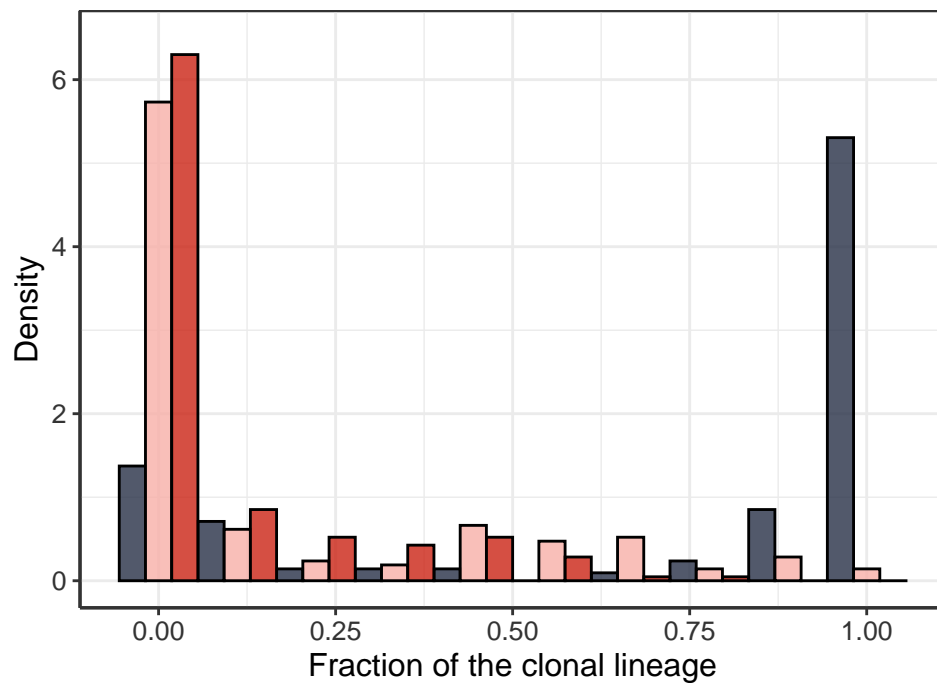

Isotype Ig M Ig G Ig A

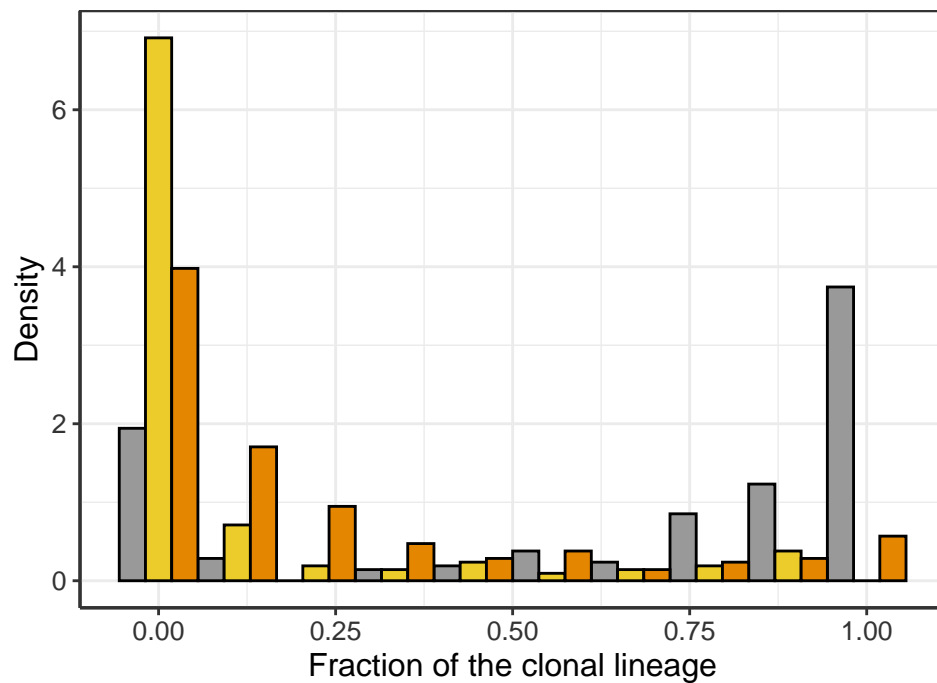

Supplement: supp [file elife-79254-supp-v2.zip]

**A**

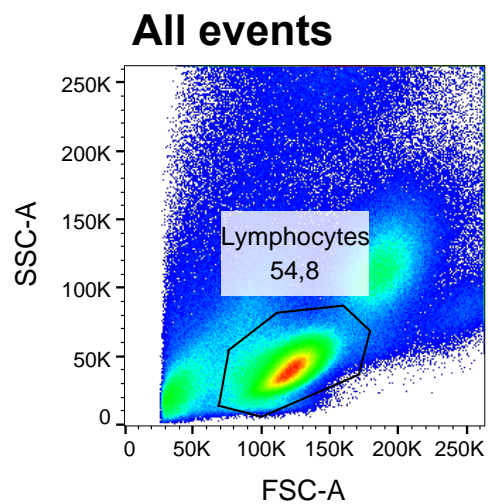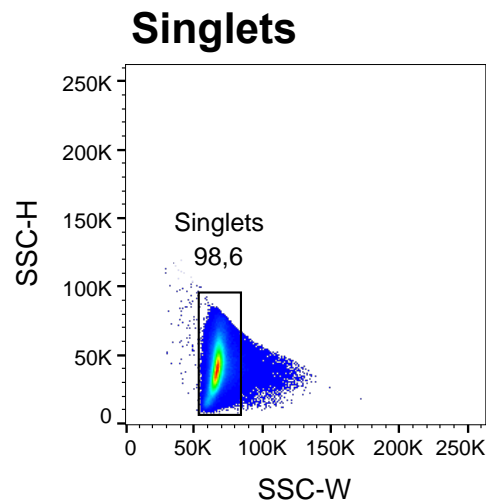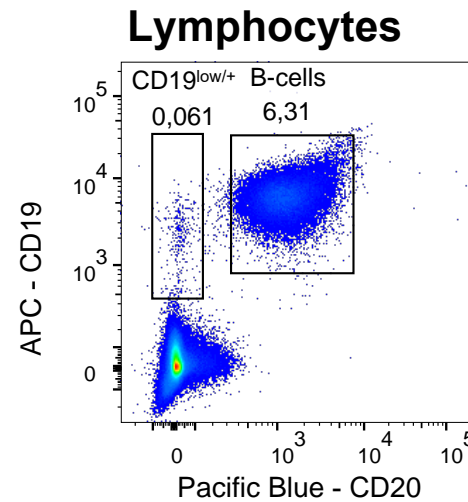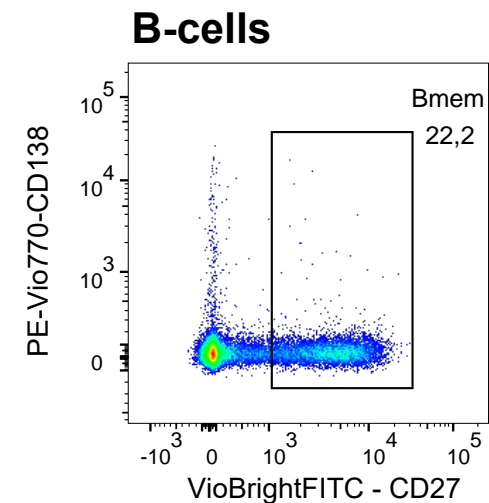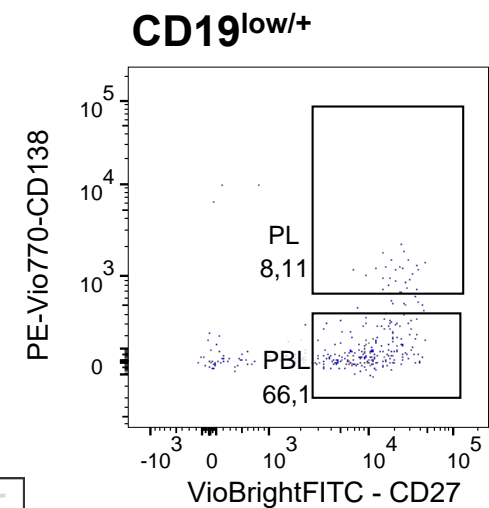

**B**

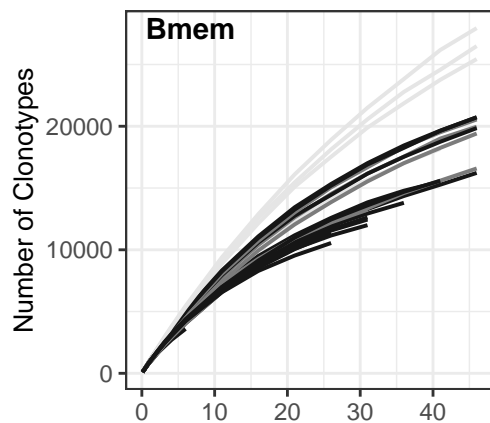

Cell sample size (x10<sup>3</sup>) — 40–50 — 50–70 — >70

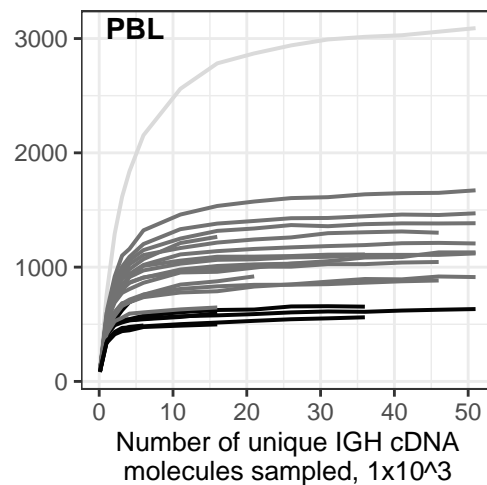

Cell sample size (x10<sup>3</sup>) — 1–2 — 2–2.5 — >2.5

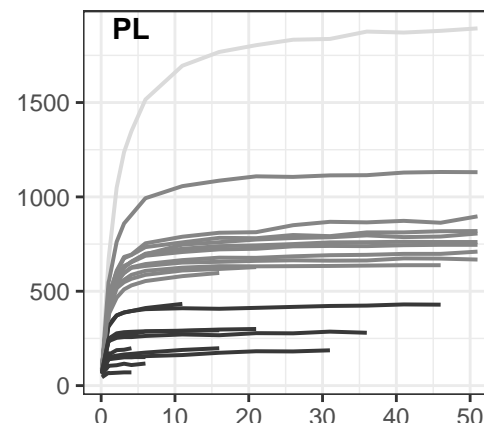

Cell sample size (x10<sup>3</sup>) — <0.8 — 0.8–1.1 — 1.8

Supplement: supp [file elife-79254-supp-v2.zip]

A

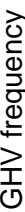

B

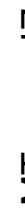

IGHV  
genes  
clustered  
by  
sequence  
similarity

Supplement: supp [file elife-79254-supp-v2.zip]
